# Supplementary material for: Construction of sandwich-type hybrid structures by anchoring mesoporous ZnMn2O4nanofoams on reduced graphene oxide with highly enhanced capability
Source: Royal Society of Chemistry journal article supplement (doi:10.1039/c6ta03226e), 2016-01-01
Supplement: c6ta03226e1.pdf [file c6ta03226e1.pdf]

## Supporting Information

---

### **Construction of sandwich-type hybrid structures by anchoring mesoporous $\text{ZnMn}_2\text{O}_4$ nanofoams on reduced graphene oxide with highly enhanced lithium storage capability**

*Guoxin Gao<sup>1</sup>, Shiyao Lu<sup>1</sup>, Bitao Dong<sup>1</sup>, Wei Yan<sup>2</sup>, Wei Wang<sup>3</sup>, Teng Zhao<sup>3</sup>, Cheng-Ye Lao<sup>3</sup>, Kai Xi<sup>\*,3</sup>, R. Vasant Kumar<sup>3</sup> and Shujiang Ding<sup>\*1</sup>*

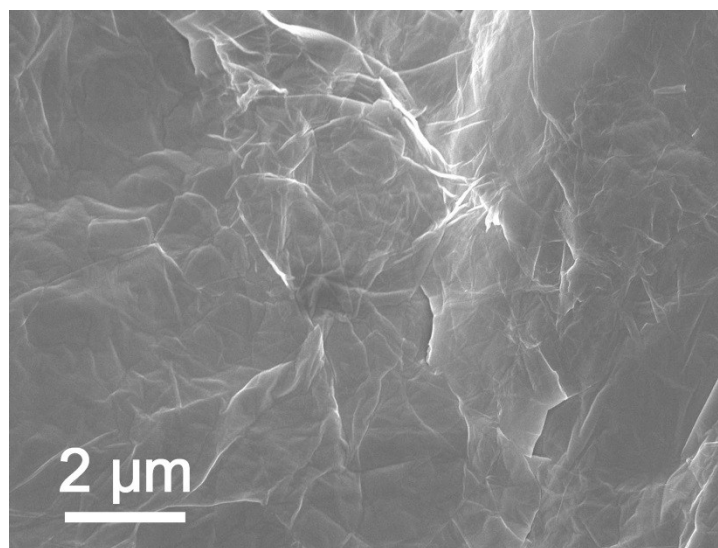

**Figure S1.** FESEM image of GO sheets.

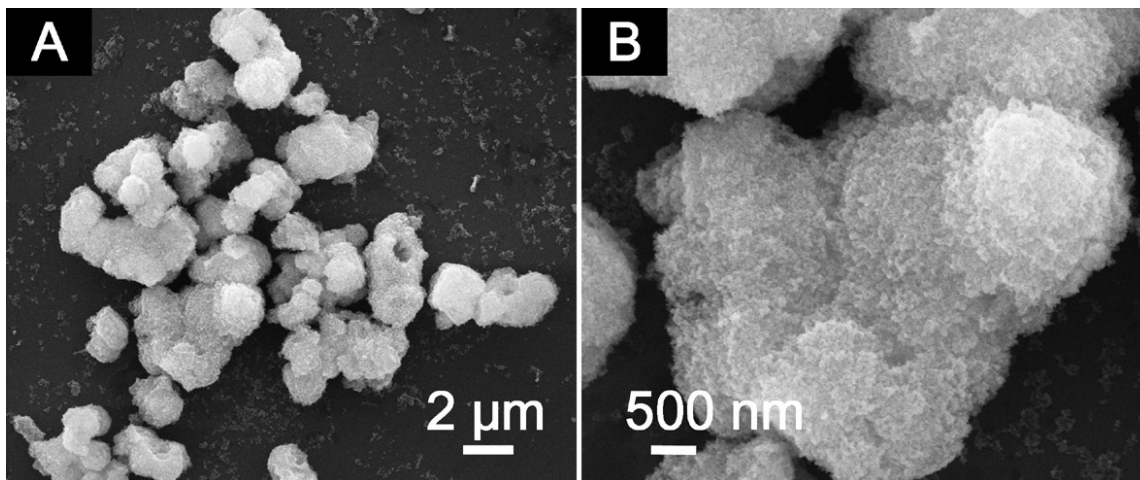

**Figure S2.** FESEM images of aggregated  $\text{ZnMn}_2\text{O}_4$  microsphere without GO sheets support.

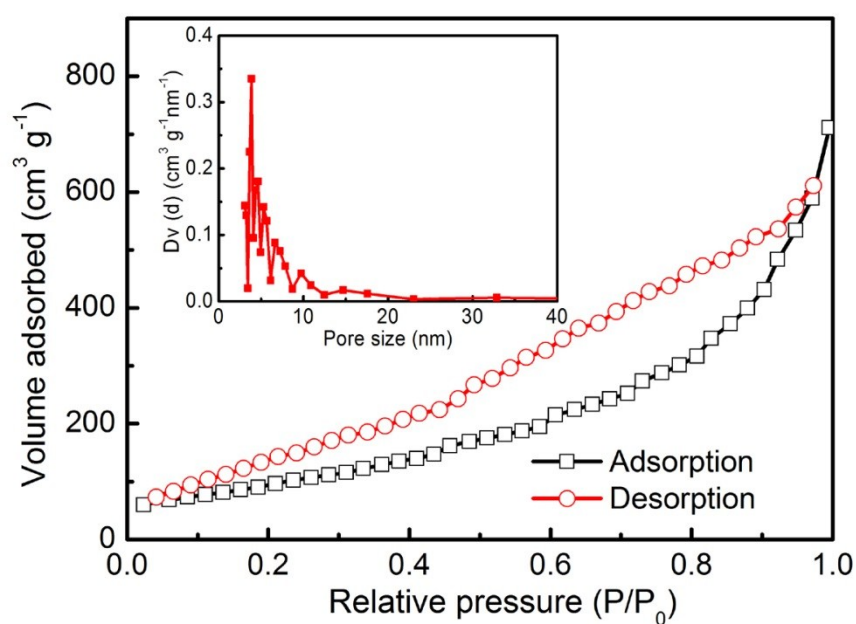

**Figure S3.**  $\text{N}_2$  adsorption-desorption isotherm of the as-prepared sandwich-type  $\text{rGO}/\text{ZnMn}_2\text{O}_4$  NFs and pore size distribution curve (inset) obtained from BJH method.

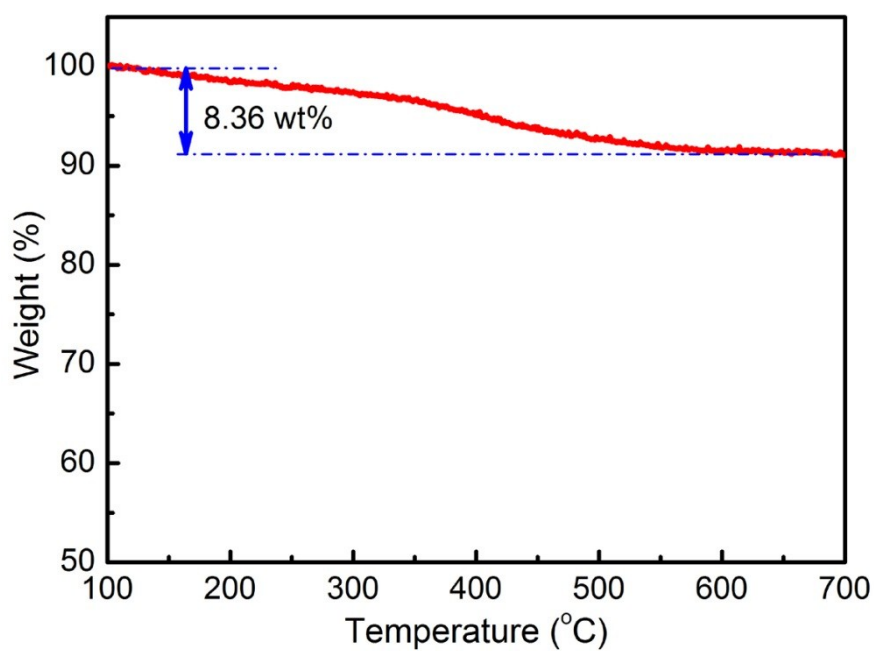

**Figure S4.** TGA profile of sandwich-type rGO/ZnMn<sub>2</sub>O<sub>4</sub> NFs in air between 100 and 600 °C with a heating rate of 10 °C min<sup>-1</sup>.

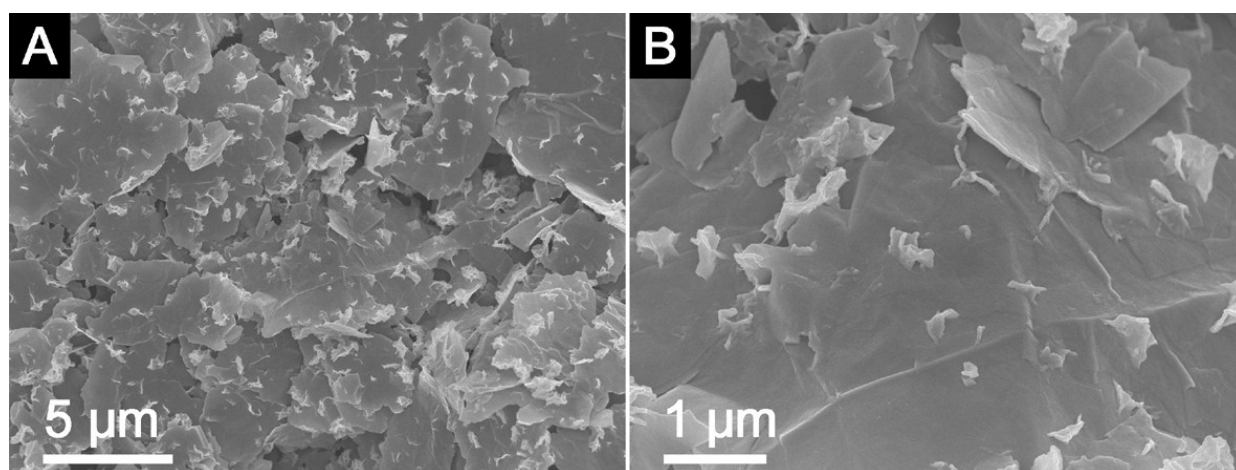

**Figure S5.** FESEM images of rGO/ZnMn<sub>2</sub>O<sub>4</sub> nanocomposites without adding HMT.

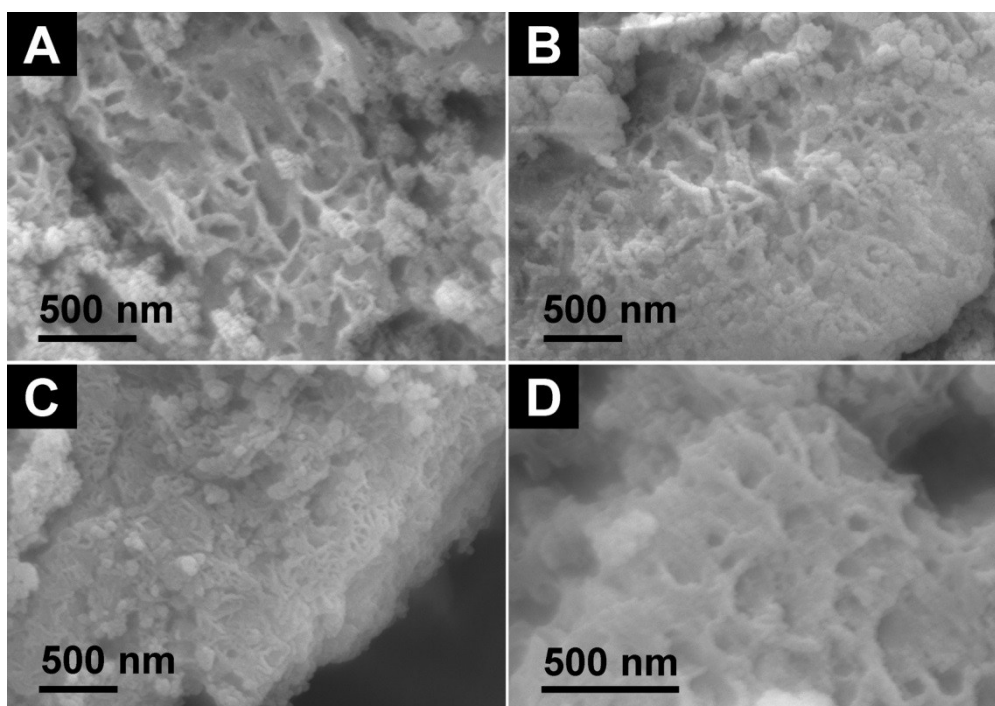

**Figure S6.** FESEM images of sandwich-type rGO/ZnMn<sub>2</sub>O<sub>4</sub> NFs after (A) 1, (B) 5, (C) 10, (D) 20 cycles at 180 mA g<sup>-1</sup> between 0.005 and 3.0 V.

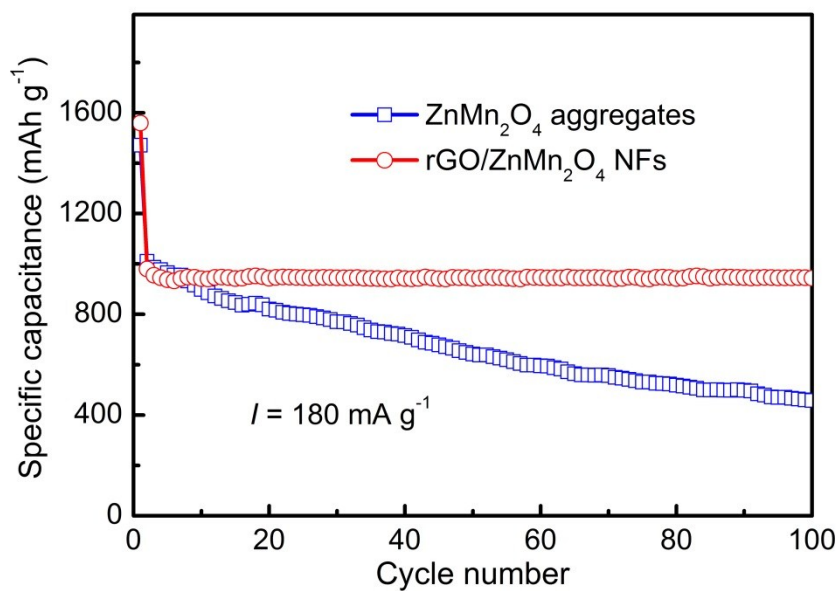

**Figure S7.** Cycling performance of aggregated ZnMn<sub>2</sub>O<sub>4</sub> microsphere and sandwich-type rGO/ZnMn<sub>2</sub>O<sub>4</sub> NFs at a current density of 180 mA g<sup>-1</sup> between 0.005 and 3 V.

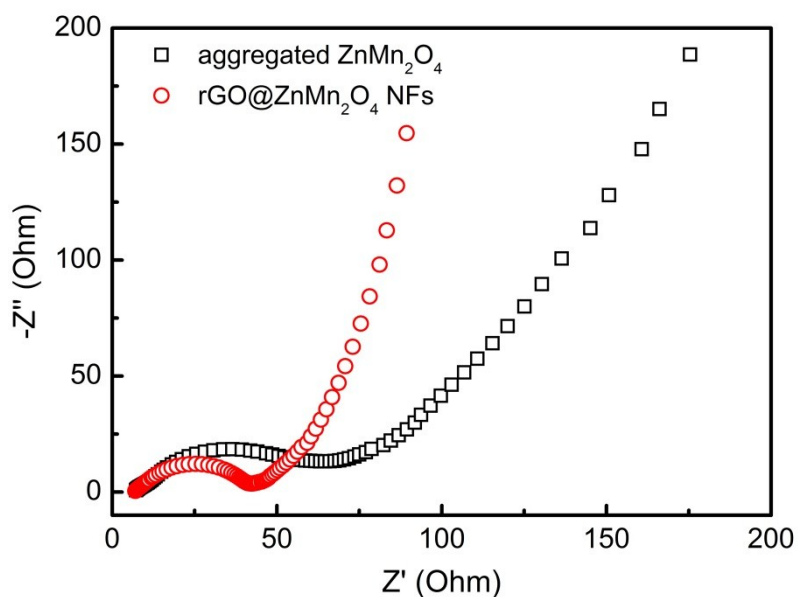

**Figure S8.** Nyquist plots of aggregated  $\text{ZnMn}_2\text{O}_4$ ,  $\text{rGO}/\text{ZnMn}_2\text{O}_4$  NFs electrodes measured with the amplitude of 5 mV over the frequency range of 100 kHz and 0.01 Hz.

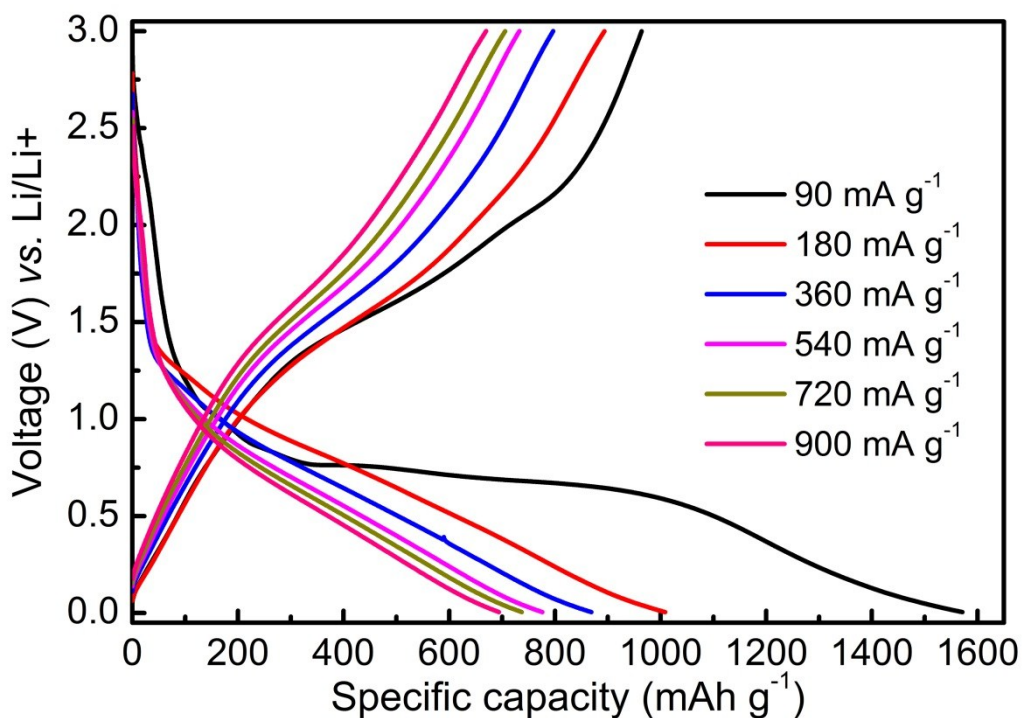

**Figure S9.** Discharge/charge voltage curves of  $\text{rGO}/\text{ZnMn}_2\text{O}_4$  NFs at different current densities in the voltage window of 0.5 mV and 3.0 V.

**Table S1.** Electrochemical comparison with other reported ZnMn<sub>2</sub>O<sub>4</sub>-based anodes.

| Electrode materials                                               | Discharge capacity in the second cycle             | Capacity retention after long cycles | Ref.      |
|-------------------------------------------------------------------|----------------------------------------------------|--------------------------------------|-----------|
| rGO/ZnMn <sub>2</sub> O <sub>4</sub> NFs                          | 980 mAh g <sup>-1</sup> at 180 mA g <sup>-1</sup>  | 96.5% after 150 cycle                | This work |
| CNT/ZnMn <sub>2</sub> O <sub>4</sub> nanosheets                   | 600 mAh g <sup>-1</sup> at 1224 mA g <sup>-1</sup> | 83.3% after 100 cycle                | 1         |
| ZnMn <sub>2</sub> O <sub>4</sub> hollow nanotubes                 | 736 mAh g <sup>-1</sup> at 200 mA g <sup>-1</sup>  | 90.9% after 280 cycles               | 2         |
| Mesoporous ZnMn <sub>2</sub> O <sub>4</sub> nanocrystals          | 771 mAh g <sup>-1</sup> at 400 mA g <sup>-1</sup>  | 94.7% after 800 cycles               | 3         |
| ZnMn <sub>2</sub> O <sub>4</sub> Tubular Arrays                   | 681 mAh g <sup>-1</sup> At 100 mA g <sup>-1</sup>  | 115.1% after 100 cycles              | 4         |
| rGO/ZnMn <sub>2</sub> O <sub>4</sub> nanoparticles                | 730 mAh g <sup>-1</sup> at 500 mA g <sup>-1</sup>  | 89% after 1500 cycles                | 5         |
| ZnMn <sub>2</sub> O <sub>4</sub> ball-in-ball hollow microspheres | 750 mAh g <sup>-1</sup> at 400 mA g <sup>-1</sup>  | 100% after 120 cycles                | 6         |
| ZnMn <sub>2</sub> O <sub>4</sub> on carbon aerogel                | 920 mAh g <sup>-1</sup> at 100 mA g <sup>-1</sup>  | 90.5% after 50 cycles                | 7         |
| ZnMn <sub>2</sub> O <sub>4</sub> hollow microsphere               | 722 mAh g <sup>-1</sup> at 400 mA g <sup>-1</sup>  | 84% after 100 cycles                 | 8         |
| Flower-like ZnMn <sub>2</sub> O <sub>4</sub>                      | 752 mAh g <sup>-1</sup> at 60 mA g <sup>-1</sup>   | 66.8% after 30 cycles                | 9         |
| Grapheme wrapped ZnMn <sub>2</sub> O <sub>4</sub> nanorods        | 975 mAh g <sup>-1</sup> at 100 mA g <sup>-1</sup>  | 72.5% after 50 cycles                | 10        |
| ZnMn <sub>2</sub> O <sub>4</sub> twin microsphere                 | 730 mAh g <sup>-1</sup> at 500 mA g <sup>-1</sup>  | 117.8% after 130 cycles              | 11        |
| Flower-like ZnMn <sub>2</sub> O <sub>4</sub>                      | 750 mAh g <sup>-1</sup> at 100 mA g <sup>-1</sup>  | 83.4% after 50 cycles                | 12        |
| Loaf-like ZnMn <sub>2</sub> O <sub>4</sub> nanorods               | 630 mAh g <sup>-1</sup> at 500 mA g <sup>-1</sup>  | 82.1% after 100 cycles               | 13        |

**Reference**

- [1] C. Z. Yuan, L. H. Zhang, S. Q. Zhu, H. Cao, J. D. Lin, L. R. Hou, Heterostructured core-shell ZnMn<sub>2</sub>O<sub>4</sub> nanosheets@carbon nanotubes' coaxial nanocables: a competitive anode towards high-performance Li-ion batteries, *Nanotechnology*, 2015, **26**, 145401.
- [2] L. Zhang, S. Zhu, H. Cao, L. Hou and C. Yuan, Hierarchical Porous ZnMn<sub>2</sub>O<sub>4</sub> Hollow Nanotubes with Enhanced Lithium Storage toward Lithium-Ion Batteries, *Chem. Eur. J.*, 2015, **21**, 10771-

10777.

- [3] C. Yuan, L. Zhang, L. Hou, L. Zhou, G. Pang and L. Lian, Scalable Room-Temperature Synthesis of Mesoporous Nanocrystalline  $\text{ZnMn}_2\text{O}_4$  with Enhanced Lithium Storage Properties for Lithium-Ion Batteries, *Chem. Eur. J.*, 2015, **21**, 1262-1268.
- [4] J. G. Kim, S. H. Lee, Y. Kim and W. B. Kim, Fabrication of Free-Standing  $\text{ZnMn}_2\text{O}_4$  Mesoscale Tubular Arrays for Lithium-Ion Anodes with Highly Reversible Lithium Storage Properties, *ACS Appl. Mater. Interfaces*, 2013, **5**, 11321-11328
- [5] P. Xiong, B. Liu, V. Teran, Y. Zhao, L. Peng, X. Wang and G. Yu, Chemically Integrated Two-Dimensional Hybrid Zinc Manganate/Graphene Nanosheets with Enhanced Lithium Storage Capability, *ACS Nano*, 2014, **8**, 8610-8616.
- [6] G. Zhang, L. Yu, H. B. Wu, H. E. Hoster and X. W. D. Lou, Formation of  $\text{ZnMn}_2\text{O}_4$  ball-in-ball hollow microspheres as a high-performance anode for lithium-ion batteries, *Adv. Mater.*, 2012, **24**, 4609-4613.
- [7] L. Yin, Z. Zhang, Z. Li, F. Hao, Q. Li, C. Wang, R. Fan and Y. Qi, Spinel  $\text{ZnMn}_2\text{O}_4$  Nanocrystal-Anchored 3D Hierarchical Carbon Aerogel Hybrids as Anode Materials for Lithium Ion Batteries, *Adv. Funct. Mater.*, 2014, **24**, 4176-4185.
- [8] L. Zhou, H. B. Wu, T. Zhu and X. W. D. Lou, Facile preparation of  $\text{ZnMn}_2\text{O}_4$  hollow microspheres as high-capacity anodes for lithium-ion batteries, *J. Mater. Chem.*, 2012, **22**, 827-829.
- [9] J. Zhao, F. Wang, P. Su, M. Li, J. Chen, Q. Yang and C. Li, Spinel  $\text{ZnMn}_2\text{O}_4$  nanoplate assemblies fabricated via “escape-by-crafty-scheme” strategy, *J. Mater. Chem.*, 2012, **22**, 13328-13333.
- [10] Z. Zheng, Y. Cheng, X. Yan, R. Wang and P. Zhang, Enhanced electrochemical properties of graphene-wrapped  $\text{ZnMn}_2\text{O}_4$  nanorods for lithium-ion batteries, *J. Mater. Chem. A*, 2014, **2**, 149-154.
- [11] Y. Liu, J. Bai, X. Ma, J. Li and S. Xiong, Formation of quasi-mesocrystal  $\text{ZnMn}_2\text{O}_4$  twin microspheres via an oriented attachment for lithium-ion batteries, *J. Mater. Chem. A*, 2014, **2**, 14236-14244.
- [12] L. Xiao, Y. Yang, J. Yin, Q. Li and L. Zhang, Low temperature synthesis of flower-like  $\text{ZnMn}_2\text{O}_4$  superstructures with enhanced electrochemical lithium storage, *J. Power Sources*, 2009, **194**, 1089-1093.
- [13] Z. Bai, N. Fan, C. Sun, Z. Ju, C. Guo, J. Yang and Y. Qian, Facile synthesis of loaf-like  $\text{ZnMn}_2\text{O}_4$  nanorods and their excellent performance in Li-ion batteries, *Nanoscale*, 2013, **5**, 2442-2447.

**Table S2.** Electrochemical comparison with other reported metal oxide@rGO-based anodes.

| Electrode materials                                                             | Discharge capacity in the second cycle             | Capacity retention after long cycles | Ref.      |
|---------------------------------------------------------------------------------|----------------------------------------------------|--------------------------------------|-----------|
| rGO/ZnMn <sub>2</sub> O <sub>4</sub> NFs for lithium ion batteries              | 980 mAh g <sup>-1</sup> at 180 mA g <sup>-1</sup>  | 96.5% after 150 cycle                | This work |
| rGO/SnO <sub>2</sub> nanoparticles for sodium ion batteries                     | 407 mAh g <sup>-1</sup> at 100 mA g <sup>-1</sup>  | 66.3% after 100 cycle                | 14        |
| rGO/TiO <sub>2</sub> for lithium ion batteries                                  | 183 mAh g <sup>-1</sup> at 5000 mA g <sup>-1</sup> | 76.5% after 100 cycles               | 15        |
| rGO/SnO <sub>2</sub> nanoparticles for sodium ion batteries                     | 936 mAh g <sup>-1</sup> at 100 mA g <sup>-1</sup>  | 123.5% after 100 cycles              | 16        |
| Fe <sub>3</sub> O <sub>4</sub> @SiO <sub>2</sub> @rGO for absorption properties | -                                                  | -                                    | 17        |
| rGO/Fe <sub>3</sub> O <sub>4</sub> nanocomposite for lithium ion batteries      | 1209 mAh g <sup>-1</sup> at                        | 87% after 40 cycles                  | 18        |

## Reference

- [14] S. Li, Y. Wang, J. Qiu, M. Ling, H. Wang, W. Martens and S. Zhang, SnO<sub>2</sub> decorated grapheme nanocomposite anode materials prepared via an up-scalable wet-mechanochemical process for sodium ion batteries, *RSC Adv.*, 2014, **4**, 50148-50152.
- [15] J. Qiu, C. Lai, Y. Wang, S. Li and S. Zhang, Resilient mesoporous TiO<sub>2</sub>/graphene nanocomposite for high rate performance lithium-ion batteries, *Chem. Eng. J.*, 2014, **256**, 247-254.
- [16] P. Lian, X. Zhu, S. Liang, Z. Li, W. Yang and H. Wang, High reversible capacity of SnO<sub>2</sub>/graphene nanocomposite as an anode material for lithium-ion batteries, *Electrochim. Acta*, 2011, **56**, 4532-4539.
- [17] Y. F. Pan, G. S. Wang and Y. H. Yue, Fabrication of Fe<sub>3</sub>O<sub>4</sub>@SiO<sub>2</sub>@rGO nanocomposites and their excellent absorption properties with low filler content, *RSC Adv.*, 2015, **5**, 71718-71723.
- [18] P. Lian, X. Zhu, H. Xiang, Z. Li, W. Yang and H. Wang, Enhanced cycling performance of Fe<sub>3</sub>O<sub>4</sub>-graphene nanocomposite as an anode material for lithium-ion batteries *Electrochim. Acta*, 2010, **56**, 834-840.
